# Supplementary material
Source: publisher site journal article supplement (https://static.cambridge.org/content/id/urn:cambridge.org:id:article:S1368980020001329/resource/name/S1368980020001329supp001.docx)
Supplement: Supplementary file 1 [file S1368980020001329supp001.docx]

| **Supplemental Table 1. Description of Survey Respondents by Home Garden Status, Full Sample** | | | | |
| --- | --- | --- | --- | --- |
|  | All participants | Have Home Garden | Do Not Have Home Garden | *p* |
| **Sample size*** | 4711 | 1451 (31%) | 3260 (69%) |  |
| **Age** | Mean (SD) | Mean (SD) | Mean (SD) |  |
| Age | 44.9 (15.5) | 44.1 (14.9) | 45.2 (15.8) | 0.0182 |
| **Gender** | N (%) | N (%) | N (%) |  |
| Male | 2259 (48.0) | 747 (33.1) | 1512 (66.9) | 0.0012 |
| Female | 2452 (52.0) | 704 (28.7) | 1748 (71.3) |
| **Race** | N (%) | N (%) | N (%) |  |
| White | 3190 (68.0) | 1070 (33.5) | 2120 (66.5) | <.0001 |
| African American/Black | 573 (12.2) | 88 (15.4) | 485 (84.6) |
| Hispanic | 657 (14.0) | 187 (28.5) | 470 (71.5) |
| Asian | 246 (5.2) | 92 (37.4) | 154 (62.6) |
| Other | 28 (0.6) | 7 (25.0) | 21 (75.0) |
| **Education** | N (%) | N (%) | N (%) |  |
| High school, GED, or less | 899 (19.1) | 268 (29.8) | 631 (70.2) | 0.0007 |
| Some College or TS | 1482 (31.5) | 408 (27.5) | 1074 (72.5) |
| College degree or more | 2330 (49.5) | 775 (33.3) | 1555 (66.7) |
| **Employment** | N (%) | N (%) | N (%) |  |
| Employed for Wages | 2275 (48.3) | 802 (35.3) | 1473 (64.7) | <.0001 |
| Self-Employed | 334 (7.1) | 111 (33.2) | 223 (66.8) |
| Out of Work | 436 (9.3) | 99 (22.7) | 337 (77.3) |
| Homemaker | 478 (10.1) | 132 (27.6) | 346 (72.4) |
| Student | 281 (6.0) | 74 (26.3) | 207 (73.7) |
| Retired | 907 (19.3) | 233 (25.7) | 674 (74.3) |
| **Income** | N (%) | N (%) | N (%) |  |
| Less than $15,000 | 622 (13.2) | 126 (20.3) | 496 (79.7) | <.0001 |
| $15,000 to $24,999 | 589 (12.5) | 149 (25.3) | 440 (74.7) |
| $25,000 to $34,999 | 536 (11.4) | 124 (23.1) | 412 (76.9) |
| $35,000 to $49,999 | 617 (13.1) | 181 (29.3) | 436 (70.7) |
| $50,000 to $74,999 | 859 (18.2) | 288 (33.5) | 571 (66.5) |
| $75,000-$99,999 | 555 (11.8) | 226 (40.7) | 329 (59.3) |
| $100,000 or more | 933 (19.8) | 357 (38.3) | 576 (61.7) |
| **Marital status** | N (%) | N (%) | N (%) |  |
| Married | 2330 (49.5) | 885 (38.0) | 1445 (62.0) | <.0001 |
| Living w/ partner | 391 (8.3) | 99 (25.3) | 292 (74.7) |
| Single | 1360 (28.9) | 345 (25.4) | 1015 (74.6) |
| Previously married | 630 (13.4) | 122 (19.4) | 508 (80.6) |
| **Children** | N (%) | N (%) | N (%) |  |
| No | 3080 (65.4) | 837 (27.2) | 2243 (72.8) | <.0001 |
| Yes | 1631 (34.6) | 614 (37.6) | 1017 (62.4) |
| **Rurality** | N (%) | N (%) | N (%) |  |
| Rural | 684 (14.5) | 303 (44.3) | 381 (55.7) | <.0001 |
| Small Town | 760 (16.1) | 232 (30.5) | 528 (69.5) |
| Suburban | 1963 (41.7) | 581 (29.6) | 1382 (70.4) |
| Urban | 1304 (27.7) | 335 (25.7) | 969 (74.3) |
| **RUCC** | N (%) | N (%) | N (%) |  |
| Rural | 462 (11.4) | 169 (36.6) | 293 (63.4) | 0.0034 |
| Semi-urban | 605 (15.0) | 204 (33.7) | 401 (66.3) |
| Urban | 2975 (73.6) | 882 (29.6) | 2093 (70.4) |
| Container Gardening | N (%) | N (%) | N (%) |  |
| No | 3531 (75.0) | 691 (19.6) | 2840 (80.4) | <.0001 |
| Yes | 1180 (25.0) | 760 (64.4) | 420 (35.6) |
| **BMI** | N (%) | N (%) | N (%) |  |
| <18.5, underweight | 142 (3.1) | 55 (38.7) | 87 (61.3) | <.0001 |
| 18.5-24.9, normal | 1680 (36.8) | 533 (31.7) | 1147 (68.3) |
| 25-29.9, overweight | 1356 (29.7) | 426 (31.4) | 930 (68.6) |
| >30, obese | 1386 (30.4) | 351 (25.3) | 1035 (74.7) |
| **BMI (cont)** | Mean (SD) | Mean (SD) | Mean (SD) |  |
| BMI | 27.7 (6.8) | 26.9 (6.2) | 28.1 (7.0) | P<.001 |
|  |  |  |  |
| **Fruit and Vegetable Intake** | N (%) | N (%) | N (%) |  |
| Not Meeting Recommendations (Fewer than 4.5 cups/day) | 4054 (86.1) | 1147 (28.3) | 2907 (71.7) | <.0001 |
| Meeting Recommendations (4.5 or more cups/day) | 657 (13.9) | 304 (46.3) | 353 (53.7) |
| **Social Capital Score** | Mean (SD) | Mean (SD) | Mean (SD) |  |
| Social Capital | 3.2 (0.8) | 3.4 (0.8) | 3.1 (0.8) | <.0001 |
| **Sample sizes vary for each variable due to missing data.* | | | | |

**Supplemental Table 2. GEE Regression Results for Fruit and Vegetable Intake as a Dichotomized, Continuous Raw, and Log Transformed Variable (n=3,889)**

| **Predictor Variables** | **Binary** | | | **Continuous (raw metric)** | | | **Log Transformed** | | |
| --- | --- | --- | --- | --- | --- | --- | --- | --- | --- |
| **OR** | **95% CI Lower** | **95% CI Upper** | **Estimate** | **95% CI Lower** | **95% CI Upper** | **Estimate** | **95% CI Lower** | **95% CI Upper** |
| **Garden** (1=Yes, 0=No) | 2.08 | 1.69 | 2.55 | 0.76 | 0.62 | 0.90 | 0.37 | 0.31 | 0.43 |
| **Gender** (1=Female, 0=Male) | 0.93 | 0.76 | 1.13 | -0.04 | -0.16 | 0.08 | -0.02 | -0.08 | 0.04 |
| **Age** | 0.99 | 0.99 | 1.00 | 0.00 | -0.01 | 0.00 | 0.00 | 0.00 | 0.00 |
| **Race** |  |  |  |  |  |  |  |  |  |
| White (Reference) | 1.00 |  |  |  |  |  |  |  |  |
| Black | 1.45 | 1.10 | 1.92 | 0.27 | 0.08 | 0.46 | 0.11 | 0.02 | 0.20 |
| Asian | 0.86 | 0.56 | 1.30 | -0.15 | -0.43 | 0.13 | -0.04 | -0.18 | 0.10 |
| Hispanic | 0.96 | 0.71 | 1.29 | -0.04 | -0.19 | 0.12 | 0.02 | -0.06 | 0.09 |
| **Income** |  |  |  |  |  |  |  |  |  |
| Less than $15,000 (Reference) | 1.00 |  |  |  |  |  |  |  |  |
| $15,000 to $24,999 | 1.16 | 0.71 | 1.90 | 0.27 | 0.02 | 0.52 | 0.20 | 0.05 | 0.34 |
| $25,000 to $34,999 | 1.01 | 0.59 | 1.73 | 0.29 | 0.03 | 0.55 | 0.22 | 0.07 | 0.37 |
| $35,000 to $49,999 | 1.32 | 0.87 | 1.99 | 0.32 | 0.09 | 0.55 | 0.25 | 0.11 | 0.38 |
| $50,000 to $74,999 | 1.53 | 1.03 | 2.27 | 0.48 | 0.27 | 0.68 | 0.36 | 0.24 | 0.48 |
| $75,000-$99,999 | 1.77 | 1.19 | 2.65 | 0.71 | 0.49 | 0.93 | 0.48 | 0.36 | 0.61 |
| $100,000 or more | 2.04 | 1.39 | 2.99 | 0.78 | 0.56 | 1.00 | 0.49 | 0.37 | 0.62 |
| **RUCC** |  |  |  |  |  |  |  |  |  |
| RUCC 1-3 (Urban) (Reference) | 1.00 |  |  |  |  |  |  |  |  |
| RUCC 4-6 (Semi-urban) | 0.95 | 0.70 | 1.29 | 0.01 | -0.17 | 0.19 | 0.02 | -0.07 | 0.11 |
| RUCC 7-9 (Rural) | 0.84 | 0.61 | 1.16 | -0.16 | -0.36 | 0.04 | -0.07 | -0.17 | 0.04 |
